# Supplementary material for: Realization of active metamaterials with odd micropolar elasticity
Source: PubMed Central journal article supplement (PMC8511045; doi:10.1038/s41467-021-26034-z), 2021-10-12
Supplement: 41467_2021_26034_MOESM3_ESM.pdf [file 41467_2021_26034_MOESM3_ESM.pdf]

## **Description of Additional Supplementary Files**

File name: Supplementary Movie 1

Description: Unidirectional amplification. Experimentally measured transverse velocity wave field in response to excitation on the left. The incident wave is a tone burst signal centred at 2 kHz.

File name: Supplementary Movie 2

Description: Unidirectional attenuation. Experimentally measured transverse velocity wave field in response to excitation on the right. The incident wave is a tone burst signal centered at 2 kHz.
